# Supplementary material
Source: publisher figshare collection journal article supplement (https://tandf.figshare.com/articles/dataset/_/5645476)
Supplement: Supplementary file 1 [file 2]

**Did you just attempt to vote? Were you successful?**

**Whether or not you were able to vote, were you asked for voter ID?**

**Did you have ID?**

**Did the poll worker accept the ID as adequate to allow you to vote?**

**If you were not allowed to vote, was it for some reason other than lack of an adequate ID?**

**Did you have any other problems in the polling place?**
