# Supplementary material
Source: publisher figshare collection journal article supplement (https://tandf.figshare.com/articles/dataset/_/5645476)
Supplement: Supplementary file 2 [file 2]

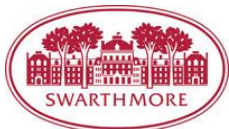

Hello. We would be very grateful if you would fill out this survey. It is part of a class exercise for a statistics course at Swarthmore College. Completion of any part of this survey is optional. All answers are anonymous. We are exploring voter ID issues in Philadelphia with no political agenda.

Did you vote or try to vote today?

- ☐ Yes
- ☐ No (your survey is complete - thank you for your time)

Was this your first time voting in this district?

- ☐ Yes
- ☐ No

Were you asked to show identification?

- ☐ Yes
- ☐ No

Do you have a valid form of identification with you right now?

- ☐ Yes
- ☐ No

Were you allowed to vote today?

- ☐ Yes
- ☐ No - I did not bring a form of identification.
- ☐ No - I did bring a form of identification, but it was not considered acceptable.
- ☐ No - for a different reason.

How would you describe your experience getting to the polling place?

- ☐ Very Easy
- ☐ Somewhat Easy
- ☐ Neutral
- ☐ Somewhat Difficult
- ☐ Very Difficult

How would you describe the process of voting (once you got to the polling place)?

- ☐ Very Easy
- ☐ Somewhat Easy
- ☐ Neutral
- ☐ Somewhat Difficult
- ☐ Very Difficult

Which one of the following best describes you?

- ☐ Asian
- ☐ Black or African American
- ☐ Hispanic or Latino/Latina
- ☐ White (Non-Hispanic)
- ☐ Other

Which one of the following best describes you?

- ☐ Under the age of 20
- ☐ Age 20-34
- ☐ Age 35-54
- ☐ Age 55 or older

Where were you born?

- ☐ Pennsylvania
- ☐ Another state in the U.S.
- ☐ Another country

Did you have any other problems inside of the polling place?
