# Supplementary material
Source: publisher figshare collection journal article supplement (https://tandf.figshare.com/articles/dataset/_/5645476)
Supplement: Supplementary file 3 [file 2]

**Polling Office:****Participants****1****2****3****4****5****6****7****8****Q1. Were you able to vote today**

Yes (Next go to question 2)

No (Next Go to question 3)

**Q2.About how long did it take you to vote, from the time you arrived at the polling place until now**

Roughly in Minutes: (Enter a number)

If not sure:

Was it &lt;10 Minutes?

Was it 10 - 30 Minutes?

Was it &gt;30 Minutes?

**Now go to question 4****Q3.Why were you unable to vote?**

Wrong polling place

Did not have correct ID

Line was too long and don't want to wait

Not registered

Other

**Terminate interview, go to closing script, and record demographic information****Q4.Did you have any problems before voting today, such as**

Going to the wrong polling place

Having to come back because of a long line

Not having the correct ID documents

Having to cast a provisional ballot

Did not have any problems today

**Terminate interview, go to closing script, and record demographic information****Demographics (do NOT ask. make a guess)****Race/Ethnicity (H:Hispanic , W:White , A:Asian, B:Black, O:Other)****Gender (M:Male, F:Female)****Age category (<30, 30-65, over 65)**

**Polling Office:****Participants****9****10****11****12****13****14****15****16****Q1. Were you able to vote today**

Yes (Next go to question 2)

No (Next Go to question 3)

**Q2.About how long did it take you to vote, from the time you arrived at the polling place until now**

Roughly in Minutes: (Enter a number)

If not sure:

Was it &lt;10 Minutes?

Was it 10 - 30 Minutes?

Was it &gt;30 Minutes?

**Now go to question 4****Q3.Why were you unable to vote?**

Wrong polling place

Did not have correct ID

Line was too long and don't want to wait

Not registered

Other

**Terminate interview, go to closing script, and record demographic information****Q4.Did you have any problems before voting today, such as**

Going to the wrong polling place

Having to come back because of a long line

Not having the correct ID documents

Having to cast a provisional ballot

Did not have any problems today

**Terminate interview, go to closing script, and record demographic information****Demographics (do NOT ask. make a guess)****Race/Ethnicity (H:Hispanic, W:White, A:Asian, B:Black, O:Other)****Gender (M:Male, F:Female)****Age category (<30, 30-65, over 65)**

**Polling Office:****Participants****17 18 19 20 21 22 23 24****Q1. Were you able to vote today**

|                             |  |  |  |  |  |  |  |  |
|-----------------------------|--|--|--|--|--|--|--|--|
| Yes (Next go to question 2) |  |  |  |  |  |  |  |  |
| No (Next Go to question 3)  |  |  |  |  |  |  |  |  |

**Q2.About how long did it take you to vote, from the time you arrived at the polling place until now**

Roughly in Minutes: (Enter a number)

If not sure:

Was it &lt;10 Minutes?

Was it 10 - 30 Minutes?

Was it &gt;30 Minutes?

**Now go to question 4****Q3.Why were you unable to vote?**

Wrong polling place

Did not have correct ID

Line was too long and don't want to wait

Not registered

Other

**Terminate interview, go to closing script, and record demographic information****Q4.Did you have any problems before voting today, such as**

Going to the wrong polling place

Having to come back because of a long line

Not having the correct ID documents

Having to cast a provisional ballot

Did not have any problems today

**Terminate interview, go to closing script, and record demographic information****Demographics (do NOT ask. make a guess)****Race/Ethnicity (H:Hispanic , W:White , A:Asian, B:Black, O:Other)****Gender (M:Male, F:Female)****Age category (<30, 30-65, over 65)**

**Polling Office:****Participants****25      26      27      28      29      30      31      32****Q1. Were you able to vote today**

|                             |  |  |  |  |  |  |  |  |
|-----------------------------|--|--|--|--|--|--|--|--|
| Yes (Next go to question 2) |  |  |  |  |  |  |  |  |
| No (Next Go to question 3)  |  |  |  |  |  |  |  |  |

**Q2.About how long did it take you to vote,  
from the time you arrived at the polling place  
until now**

Roughly in Minutes: (Enter a number)

If not sure:

Was it &lt;10 Minutes?

Was it 10 - 30 Minutes?

Was it &gt;30 Minutes?

**Now go to question 4****Q3.Why were you unable to vote?**

Wrong polling place

Did not have correct ID

Line was too long and don't want to wait

Not registered

Other

**Terminate interview, go to closing script, and record demographic information****Q4.Did you have any problems before  
voting today, such as**

Going to the wrong polling place

Having to come back because of a long line

Not having the correct ID documents

Having to cast a provisional ballot

Did not have any problems today

**Terminate interview, go to closing script, and record demographic information****Demographics (do NOT ask. make a guess)****Race/Ethnicity (H:Hispanic , W:White ,  
A:Asian, B:Black, O:Other)****Gender (M:Male, F:Female)****Age category (<30, 30-65, over 65)**

**Polling Office:**

| Participant No | Question 3 - Other Explanation |
|----------------|--------------------------------|
| 1              |                                |
| 2              |                                |
| 3              |                                |
| 4              |                                |
| 5              |                                |
| 6              |                                |
| 7              |                                |
| 8              |                                |
| 9              |                                |
| 10             |                                |
| 11             |                                |
| 12             |                                |
| 13             |                                |
| 14             |                                |
| 15             |                                |

**Polling Office:**

| Participant No | Question 3 - Other Explanation |
|----------------|--------------------------------|
| 16             |                                |
| 17             |                                |
| 18             |                                |
| 19             |                                |
| 20             |                                |
| 21             |                                |
| 22             |                                |
| 23             |                                |
| 24             |                                |
| 25             |                                |
| 26             |                                |
| 27             |                                |
| 28             |                                |
| 29             |                                |
| 30             |                                |
