# Supplementary material
Source: publisher figshare collection journal article supplement (https://tandf.figshare.com/articles/dataset/_/5645476)
Supplement: Supplementary file 4 [file 2]

Archive with 4 entries (4 files):
- AU Survey.pdf
- Appendix.doc
- SC Survey.pdf
- SMU Survey.pdf
